# Supplementary material for: Effect of substrate charge density on the adsorption of intrinsically disordered protein amyloid β40: a molecular dynamics study
Source: Royal Society of Chemistry journal article supplement (doi:10.1039/d2sm01581a), 2023-01-01
Supplement: d2sm01581a1.pdf [file d2sm01581a1.pdf]

## Supporting Information

# Effect of substrate charge density on the adsorption of intrinsically disordered protein amyloid $\beta$ 40: A molecular dynamics study<sup>†</sup>

Pandurangan Kalipillai, E. Raghuram, and Ethayaraja Mani\*

*Polymer Engineering and Colloid Science Lab, Department of Chemical Engineering,  
Indian Institute of Technology Madras, Chennai - 600036, India*

E-mail: ethaya@iitm.ac.in

## S1. Secondary structural analysis

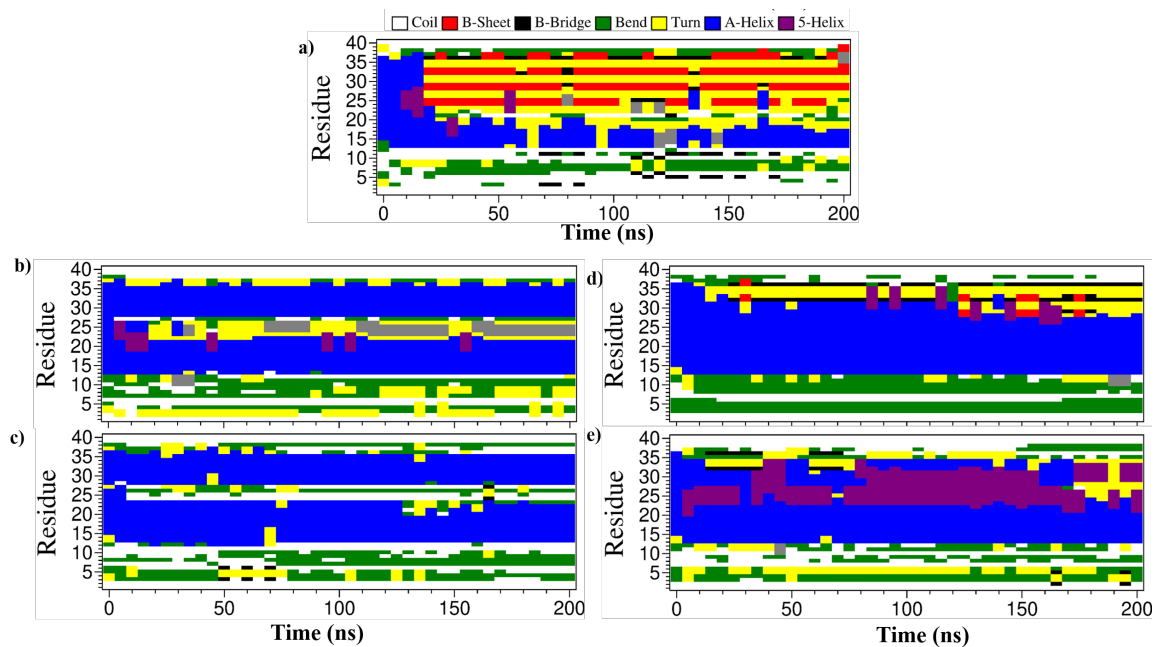

Figure S1: Time evolution of secondary structure of A $\beta$ 40 for different system by DSSP analysis. (a) CP (b) 0.0, (c) -0.033, (d) -0.100, (e) -0.167  $e/nm^2$

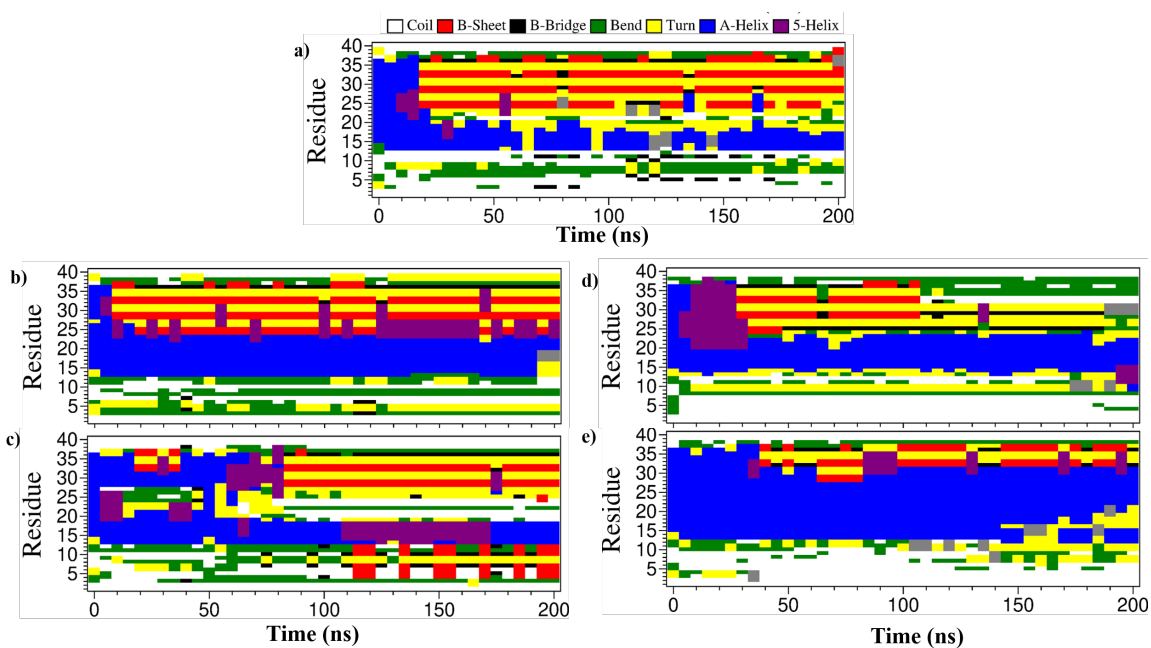

Figure S2: Time evolution of secondary structure of A $\beta$ 40 for different system by DSSP analysis. (a) CP (b) -0.234 (c) -0.267 (d) -0.300 (e) -0.334 (e/nm<sup>2</sup>)

## S2. Comparison of H-REMD and normal MD

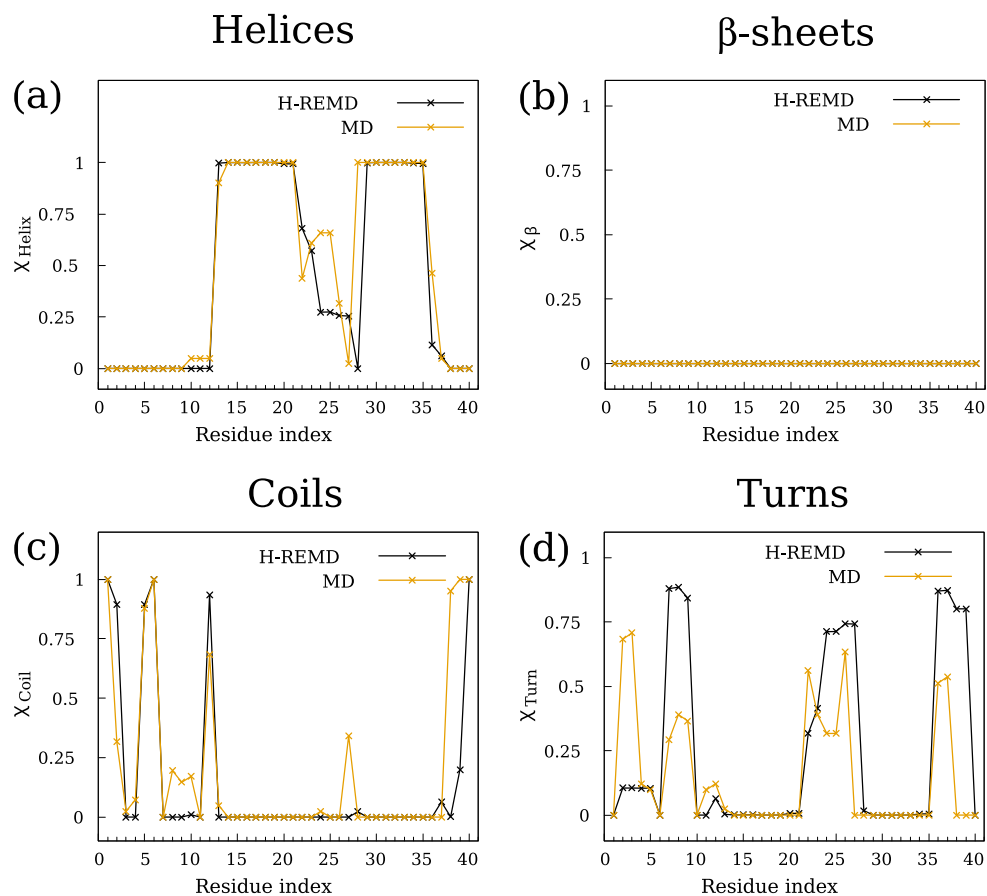

Figure S3: Fraction of (a) helices, (b)  $\beta$ -sheets, (c) coils, and (d) turns as a function of residue index for A $\beta$ 40 on neutral Au slab.

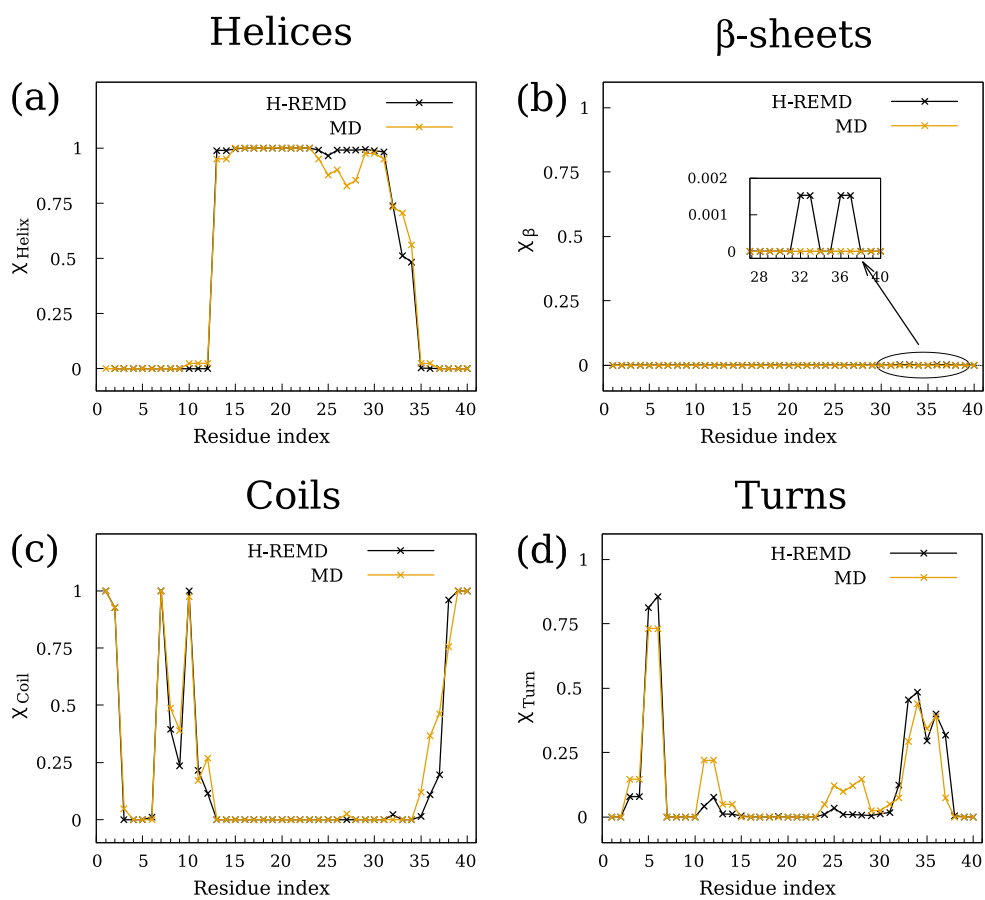

Figure S4: Fraction of (a) helices, (b)  $\beta$ -sheets, (c) coils, and (d) turns as a function of residue index for A $\beta$ 40 on negatively charged ( $-0.167 \text{ e/nm}^2$ ) Au slab.

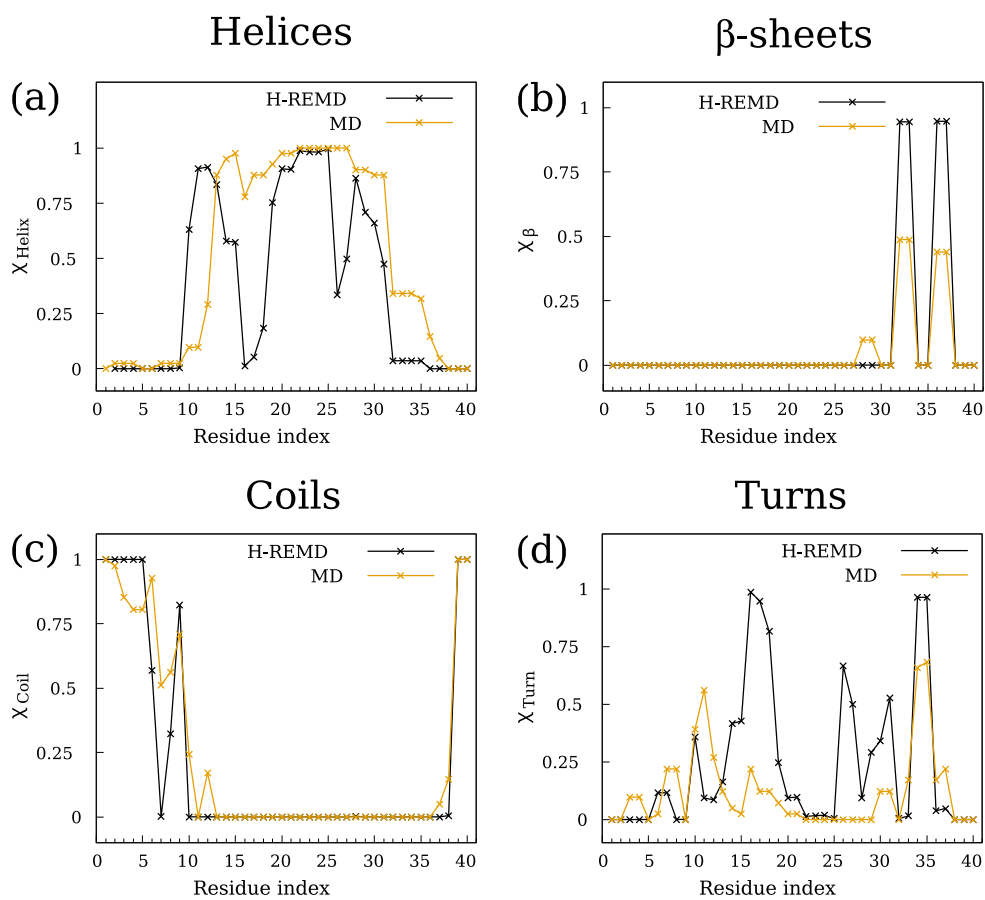

Figure S5: Fraction of (a) helices, (b)  $\beta$ -sheets, (c) coils, and (d) turns as a function of residue index for A $\beta$ 40 on negatively charged ( $-0.334 \text{ e/nm}^2$ ) Au slab.

### S3. Counterion condensation

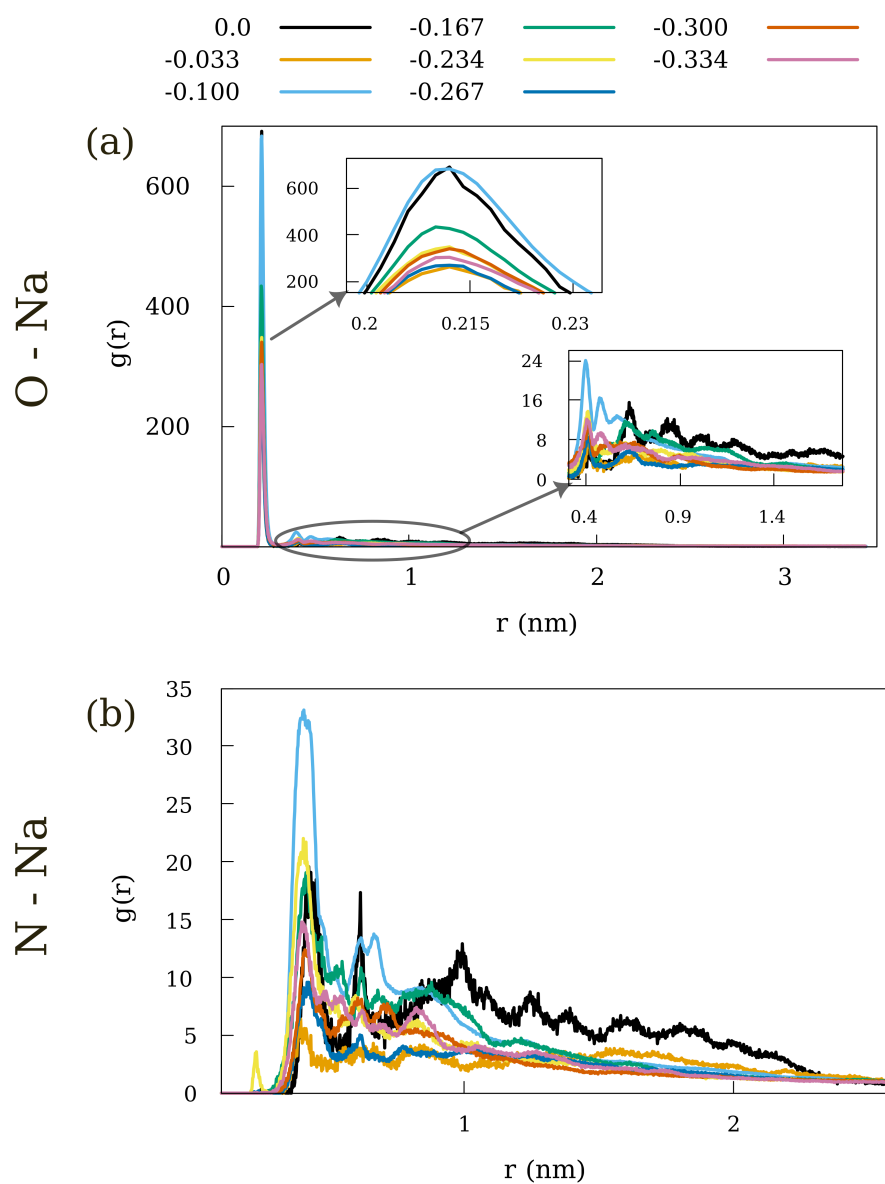

Figure S6: Radial distribution function between (a)  $O^{\delta-}$  and  $Na^+$ , and (b)  $N^{\delta-}$  and  $Na^+$ .

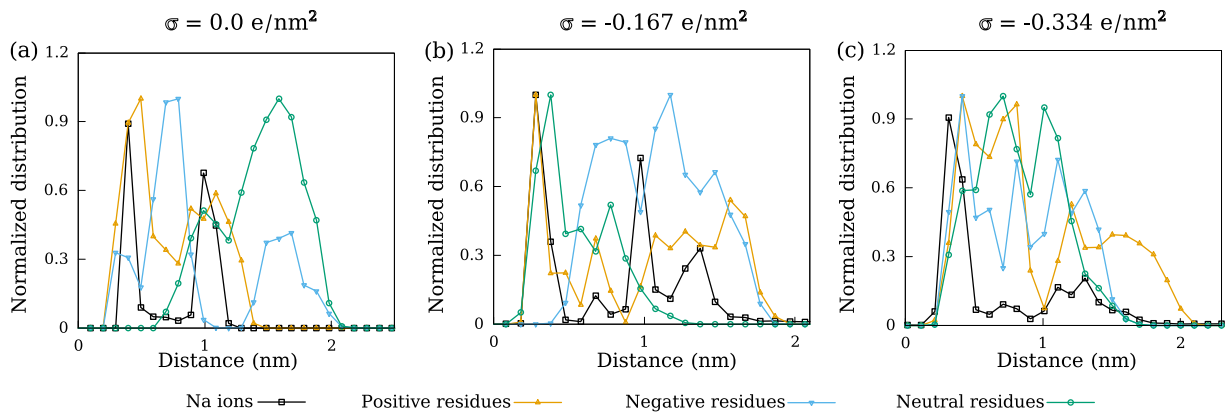

Figure S7: Planar normalized distribution of counterions (Na), positively charged residues, negatively charged residues, and neutral residues are shown for (a)  $\sigma = 0.0 \text{ e/nm}^2$ , (b)  $-0.167 \text{ e/nm}^2$ , (c)  $-0.334 \text{ e/nm}^2$ . Since the number density is different for each atoms/residues, we have normalized them individually.
